# Supplementary material for: Trends in estrogen and progesterone receptors in prostate cancer: a bibliometric analysis
Source: Frontiers journal article supplement (doi:10.3389/fonc.2023.1111296), 2023-06-09
Supplement: Data_Sheet_1.pdf [file Data_Sheet_1.pdf]

## *Supplementary Material*

### 1 Supplementary Tables:

**Supplementary Table S1** | The top 10 H-index journals published in the field.

| Element                                                                               | h_index | g_index | TC   | NP | PY_start | Bradford's zone |
|---------------------------------------------------------------------------------------|---------|---------|------|----|----------|-----------------|
| PROSTATE                                                                              | 21      | 35      | 1250 | 36 | 2003     | Zone 1          |
| PLOS ONE                                                                              | 20      | 27      | 788  | 30 | 2009     | Zone 1          |
| MOLECULAR ENDOCRINOLOGY                                                               | 18      | 21      | 815  | 21 | 2004     | Zone 1          |
| CANCER RESEARCH                                                                       | 17      | 17      | 1177 | 17 | 2003     | Zone 1          |
| JOURNAL OF BIOLOGICAL CHEMISTRY                                                       | 15      | 17      | 759  | 17 | 2003     | Zone 1          |
| JOURNAL OF STEROID BIOCHEMISTRY<br>AND MOLECULAR BIOLOGY                              | 15      | 24      | 620  | 26 | 2004     | Zone 1          |
| MOLECULAR AND CELLULAR<br>ENDOCRINOLOGY                                               | 14      | 24      | 630  | 24 | 2005     | Zone 1          |
| ENDOCRINE-RELATED CANCER                                                              | 13      | 20      | 926  | 20 | 2004     | Zone 1          |
| ONCOTARGET                                                                            | 12      | 16      | 414  | 16 | 2011     | Zone 1          |
| PROCEEDINGS OF THE NATIONAL<br>ACADEMY OF SCIENCES OF THE UNITED<br>STATES OF AMERICA | 12      | 14      | 744  | 14 | 2004     | Zone 1          |

**Supplementary Table S2** | Top 20 Keywords contributing to the field.

| Rank | Keyword          | Occurrences | Total link strength |
|------|------------------|-------------|---------------------|
| 1    | prostate cancer  | 499         | 1654                |
| 2    | gene expression  | 291         | 1146                |
| 3    | er               | 278         | 957                 |
| 4    | ar               | 263         | 992                 |
| 5    | er $\beta$       | 219         | 907                 |
| 6    | er $\alpha$      | 215         | 812                 |
| 7    | estrogen         | 119         | 454                 |
| 8    | growth           | 90          | 411                 |
| 9    | proliferation    | 83          | 379                 |
| 10   | cancer           | 71          | 284                 |
| 11   | androgen         | 66          | 270                 |
| 12   | carcinoma        | 61          | 268                 |
| 13   | apoptosis        | 59          | 271                 |
| 14   | activation       | 58          | 247                 |
| 15   | cells            | 55          | 242                 |
| 16   | nuclear receptor | 50          | 193                 |
| 17   | pr               | 49          | 191                 |
| 18   | progression      | 49          | 210                 |
| 19   | in-vitro         | 44          | 171                 |
| 20   | transcription    | 40          | 155                 |

## 2 Supplementary Figures:

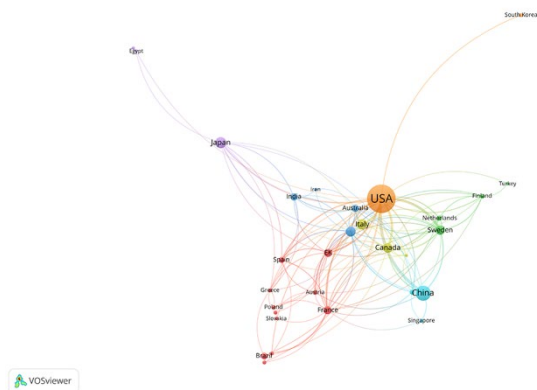

**Supplementary Figure S1.** Co-citation network graph of the cited references for these articles.

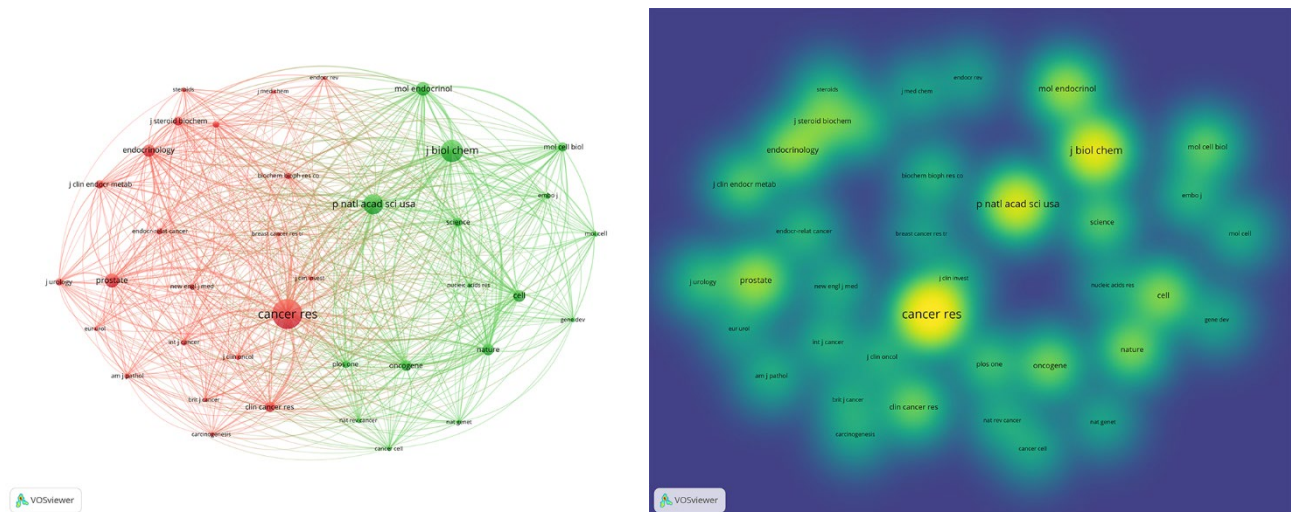

**Supplementary Figure S2.** Co-citation analysis of sources of these documents.

(A) Network map of co-citation between sources with more than 60 citations.

(B) Density map of co-citation between sources with more than 60 citations (yellow means more frequent)

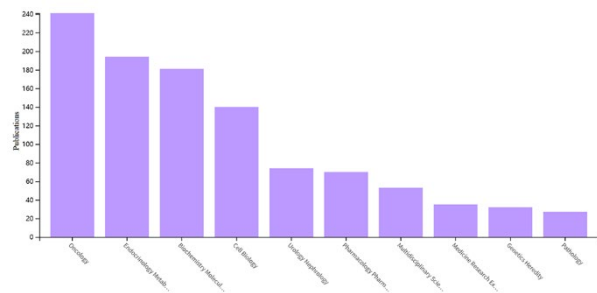

**Supplementary Figure S3.** Top 10 most popular research topic categories.

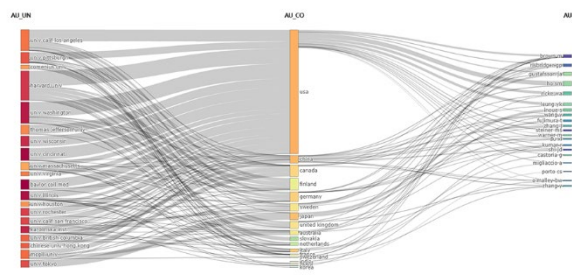

**Supplementary Figure S4.** Three-field plot among the most productive countries(middle) institutions(left), and top authors(right).

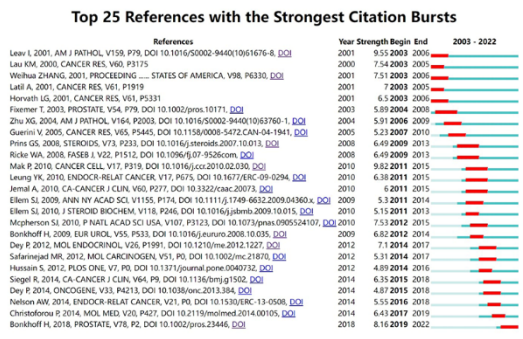

**Supplementary Figure S5.** Top 25 references with the strongest citation bursts.
